# Supplementary material for: Large-Scale Production of Human iPSC-Derived Macrophages for Drug Screening
Source: MDPI journal article supplement (doi:10.3390/ijms21134808), 2020-07-07
Supplement: s1 [file s1]

# **Large-scale production of human iPSC-derived macrophages for drug screening**

S. Gutbier<sup>1,3,4</sup>, F. Wanke<sup>2</sup>, N. Dahm<sup>1</sup>, A. Rümmelin<sup>1,2</sup>, S. Zimmermann<sup>1</sup>, K. Christensen<sup>1</sup>, F. Köchl<sup>3</sup>, A. Rautanen<sup>3</sup>, K. Hatje<sup>3</sup>, B. Geering<sup>2</sup>, D. Zhang<sup>3</sup>, M. Britschgi<sup>4</sup>, S. A. Cowley<sup>5</sup>, C. Patsch<sup>1,6</sup>

Supplementary Information

| Material                                               | Supplier                     | Cat.No.                  |
|--------------------------------------------------------|------------------------------|--------------------------|
| <b>Plastic ware:</b>                                   |                              |                          |
| Aggrewell 800                                          | STEMCELL Technologies        | 27865                    |
| B10, B15 , Cell disk                                   | Falcon, VWR, Greiner         | 353003, 734-2322, 678101 |
| Strainer 40 uM                                         | Falcon                       | 352360                   |
| <b>Coating:</b>                                        |                              |                          |
| Lam521                                                 | BioLamina                    | LN521-05                 |
| Growth factor reduced Matrigel                         | Corning                      | 354230                   |
| <b>Media + Supplements</b>                             |                              |                          |
| mTESR                                                  | STEMCELL Technologies        | 85850                    |
| XVIVO 15                                               | Lonza                        | BE02-053Q                |
| DMEM/F12                                               | Gibco                        | 12634-010                |
| Glutamax                                               | Gibco                        | 35050-061                |
| Penicillin/Streptomycin                                | Gibco                        | 15140-122                |
| Beta-Mercaptoethanol                                   | Gibco                        | 31350-010                |
| PBS containing Ca/Mg (++)                              | Gibco                        | 14040174                 |
| PBS w/o Ca/Mg                                          | Gibco                        | 14190250                 |
| Accutase                                               | Innovative Cell Technologies | AT-104                   |
| <b>Growth factors/morphogens</b>                       |                              |                          |
| Y27632 (Rock inhibitor)                                | Calbiochem                   | 688000                   |
| hrVEGF(vascular endothelial growth factor),            | R&D                          | 293-VE                   |
| hrSCF (human stem cell factor)                         | R&D                          | 235-SC                   |
| hrBMP4 (human recombinant bone morphogenic protein-4)  | R&D                          | 314-BP                   |
| hrlL-3 (interleukin 3)                                 | Miltenyi Biotech             | 130-095-069              |
| hrM-CSF (macrophage colony-stimulating factor)         | Miltenyi Biotech             | 130-096-493              |
| <b>FACS_QC Setup:</b>                                  |                              |                          |
| CD11b_APC, anti REA ab                                 | Miltenyi Biotech             | 130-110-612              |
| CD14-PE, antiREa                                       | Miltenyi Biotech             | 130-110-577              |
| CD68-APC Vio770, anti REA ab                           | Miltenyi Biotech             | 130-114-654              |
| CD16_Vio PE770, anti REA ab                            | Miltenyi Biotech             | 130-113-956              |
| Ki67-PEVio615, anti REA ab                             | Miltenyi Biotech             | 130-120-558              |
| FOX-P3 buffer kit                                      | Miltenyi Biotech             | 130-093-142              |
| Auto MACS Running buffer or BSA/EDTA containing buffer | Miltenyi Biotech             | 130-091-221              |
| AntiREa(I) ctrl -PEVio615                              | Miltenyi Biotech             | 130-107-771              |
| Viobility 405/452                                      | Miltenyi Biotech             | 130-109-816              |

**FigS.1 Material list**

| <b>day21</b>   | <b>Lam521 IPS SFC840-03-01</b> | <b>Matrigel IPS SFC840-03-01</b> |
|----------------|--------------------------------|----------------------------------|
| % pos CD14     | 73.5                           | -                                |
| % pos CD11b    | 65.3                           | -                                |
| % pos CD68     | -                              | -                                |
| % pos Ki67     | -                              | -                                |
| yield of cells | 1.5x10 <sup>6</sup>            | -                                |
| <b>day34</b>   | <b>Lam521 IPS SFC840-03-01</b> | <b>Matrigel IPS SFC840-03-01</b> |
| % pos CD14     | 98.6                           | 98.5                             |
| % pos CD11b    | 97.6                           | 97.1                             |
| % pos CD68     | 96.9                           | 95.7                             |
| % pos Ki67     | 3.65                           | 2.4                              |
| yield of cells | 36.5x10 <sup>6</sup>           | 1.2x10 <sup>6</sup>              |
| <b>day41</b>   | <b>Lam521 IPS SFC840-03-01</b> | <b>Matrigel IPS SFC840-03-01</b> |
| % pos CD14     | 97.3                           | 98.5                             |
| % pos CD11b    | 98.2                           | 98.7                             |
| % pos CD68     | 95.2                           | 93.7                             |
| % pos Ki67     | 10.5                           | 31                               |
| yield of cells | 30x10 <sup>6</sup>             | 8.5x10 <sup>6</sup>              |

## FigS.2 Comparison of myeloid factories derived from iPSC cultured either on LAM521 or Matrigel

Starting cultures of iPSC were either maintained on dishes coated with Lam521 or growth factor reduced matrigel. Embryoid body formation and EB replating was performed as described in materials and methods. Harvests from myeloid factories (B10 dishes) at different days of differentiation were compared in regards of yield and marker expression

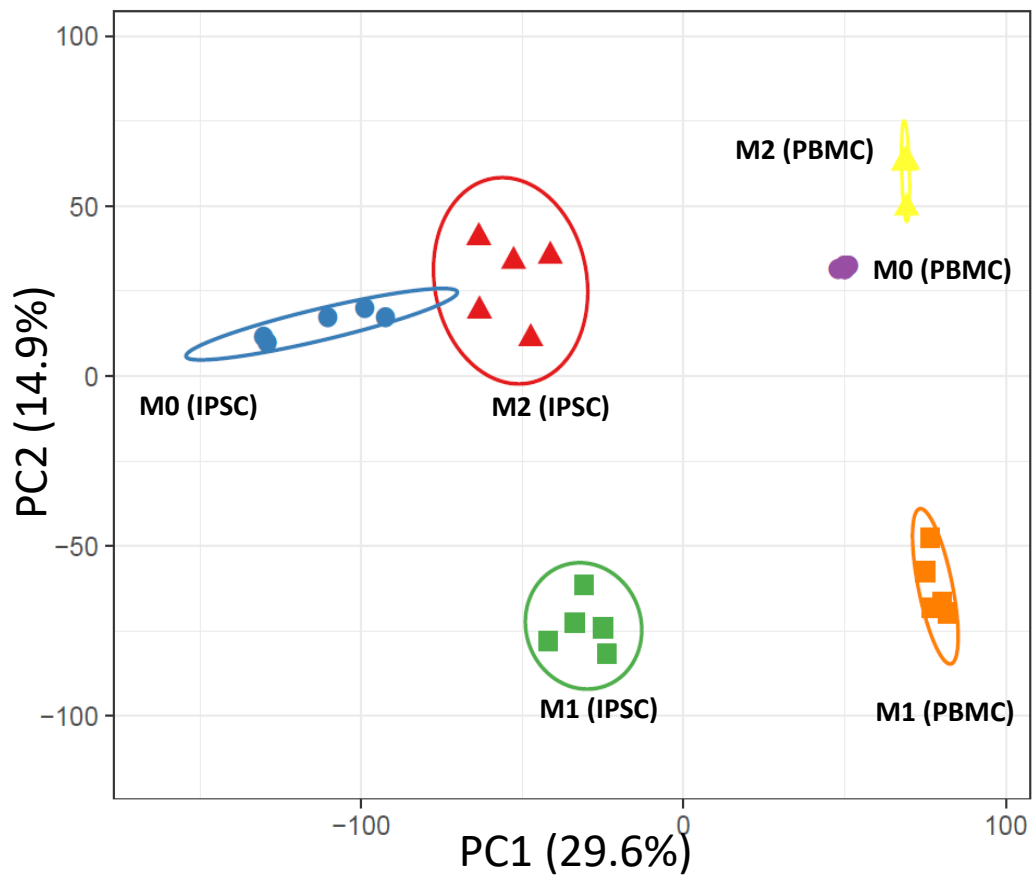

**FigS.3 PCA of complete gene set covered by RNAseq.**

Macrophages derived either from CD14 positive cells purchased from LONZA (single donor, 5 different vials thawed) or derived from iPSC (5 different differentiations from one iPSC line) via myeloid factories were polarized for 7 days. RNA was extracted and gene expression profile was assessed using RNAseq. A principal component analysis of the complete data set is shown.

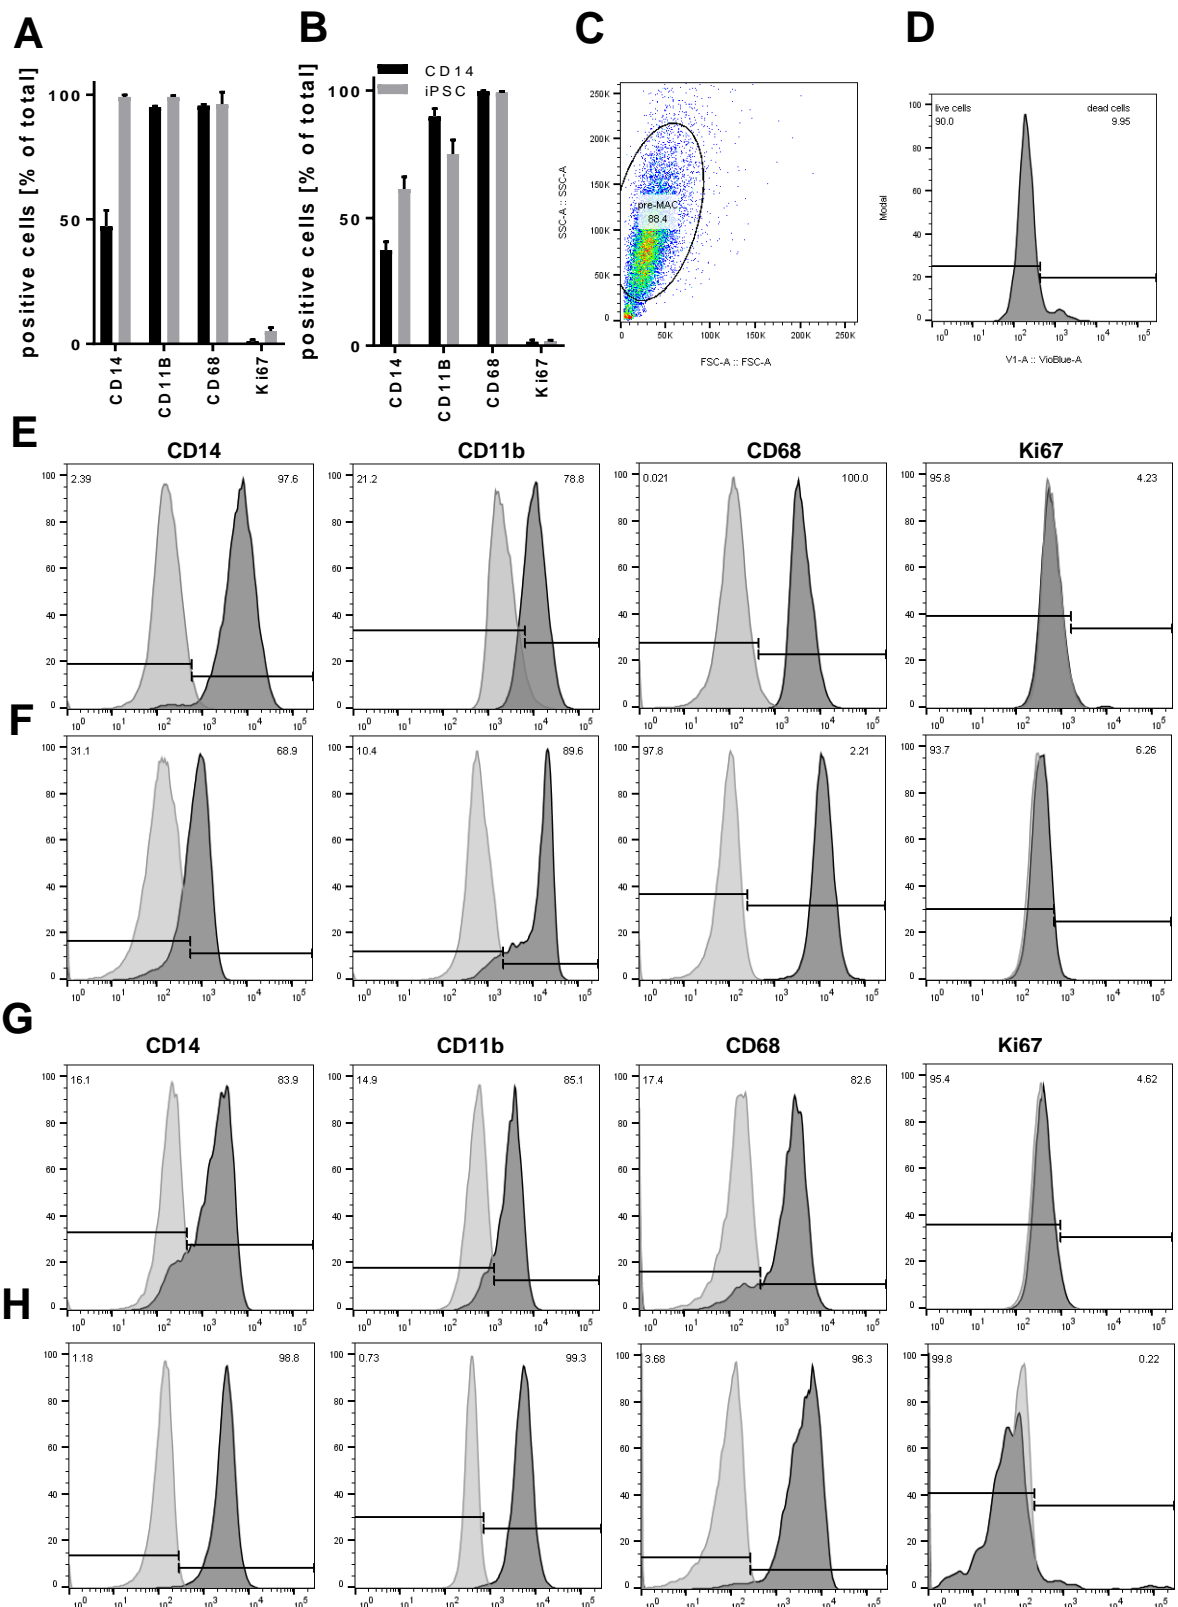

**Fig. S4: Marker expression in PBMC derived monocytes and Macrophages**

CD14 positive cells purchased from LONZA and macrophage progenitors and macrophages derived from iPSC were stained for CD14, CD68, CD11B and Ki67 and analyzed by flow cytometry. **A:** Marker expression in CD14 monocytes and macrophage progenitors derived from iPSC (n=3) **B:** Marker expression in CD14 derived macrophages (M0) and macrophage (M0) derived from iPSC (n=3) **C:** Gating strategy forward-sideward scatter **D:** Gating strategy viability for live stainings **E:** Representative FACS plots for macrophage progenitors derived from iPSC **F:** Representative FACS plots for monocytes from LONZA **G:** Representative FACS plots for macrophages derived from iPSC **H:** Representative FACS plots for macrophages derived from LONZA CD14 positive cells

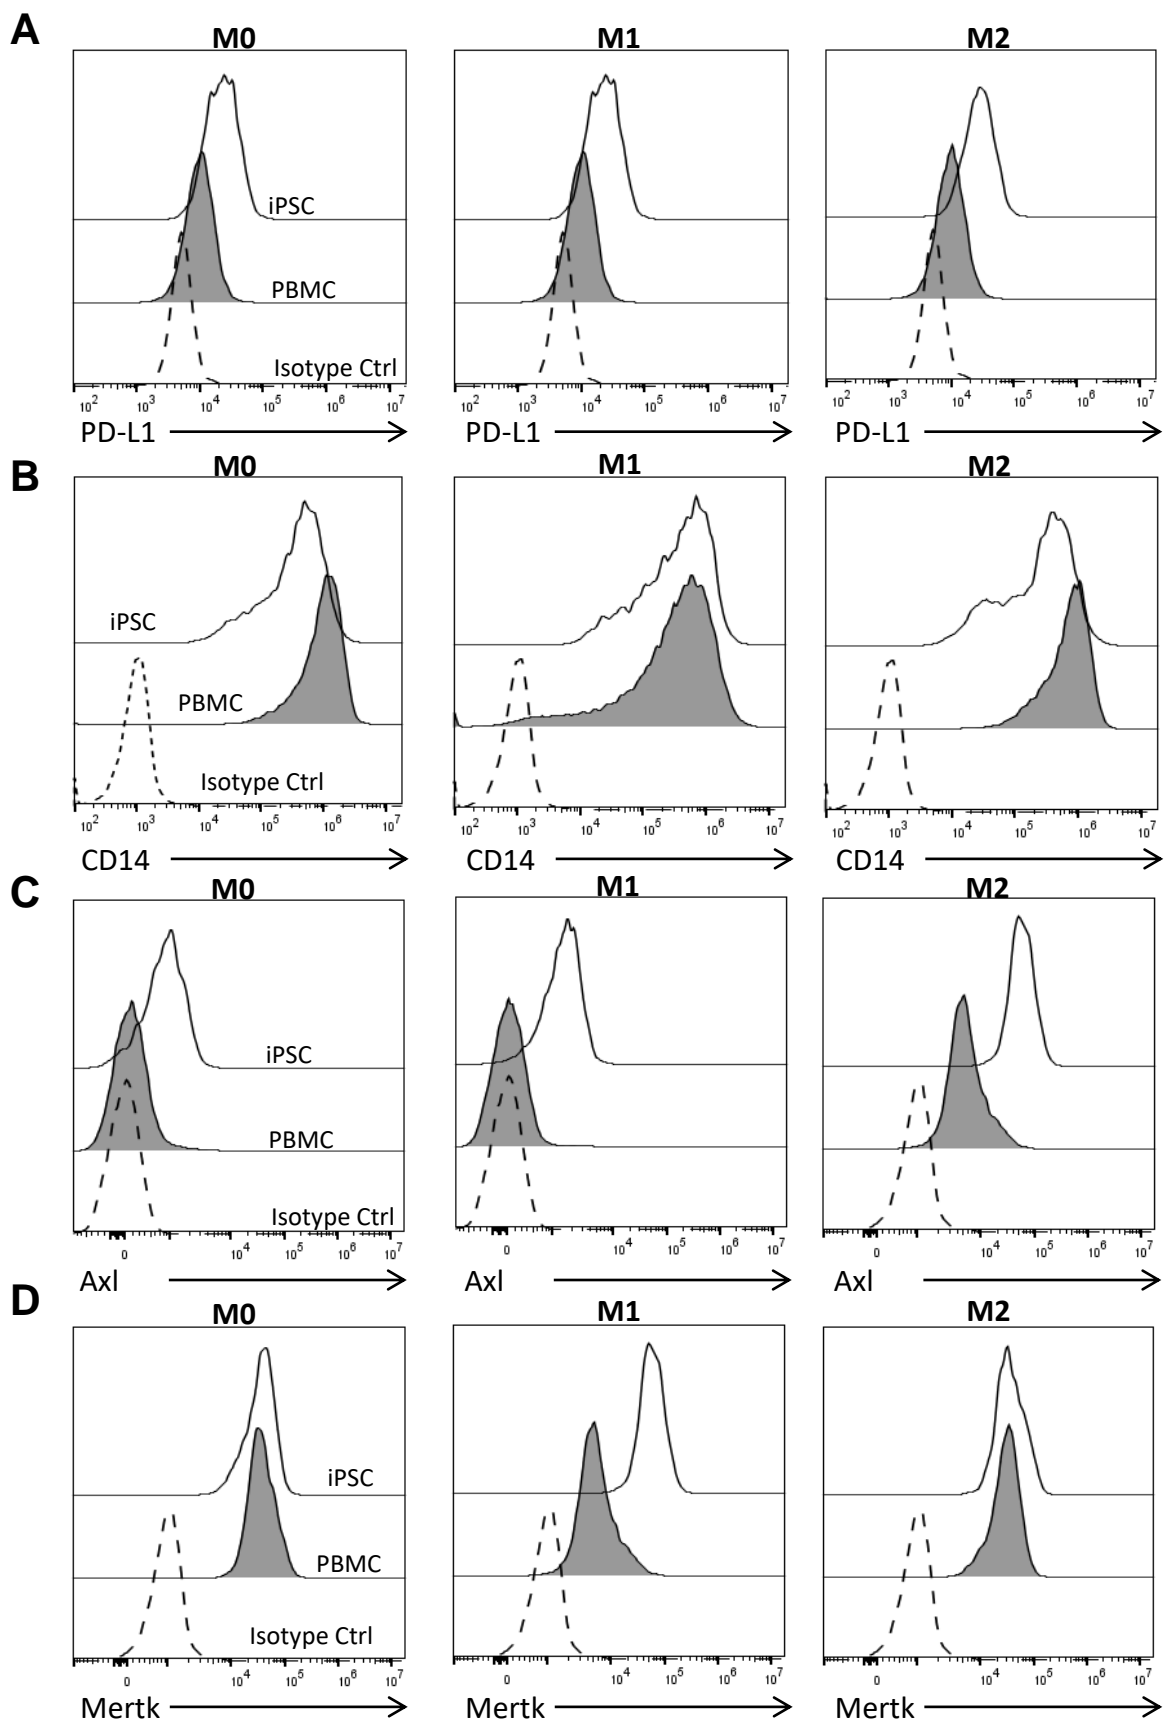

**Fig. S5: Marker expression in iPSC and PBMC derived Macrophages**

Macrophages derived from iPSC and PBMC were stained for PD-L1 CD14, AXL and Mertk and analyzed by flow cytometry. **A:** Intensity histogram of PD-L1 of macrophages derived from PBMC and iPSC **B:** Intensity histogram of CD14 macrophages derived from PBMC and iPSC **C:** Intensity histogram of AXL macrophages derived from PBMC and iPSC **D:** Intensity histogram of MERTK macrophages derived from PBMC and iPSC

| Compound           | MoA                                   | Pathways                   | Rationale                                  | References                     |
|--------------------|---------------------------------------|----------------------------|--------------------------------------------|--------------------------------|
| Forskolin          | activator of adenylate cyclase        | cAMP downstream pathways   | investigation of GPCR downstream responses | PMID: 29422898;PMID 21097507   |
| Dibutyl cAMP       | cAMP elevation                        | cAMP downstream pathways   | investigation of GPCR downstream responses | PMID: 31935860                 |
| AZD8055            | mTOR inhibitor                        | cAMP downstream pathways   | investigation of GPCR downstream responses | PMID: 30170968                 |
| SB203580           | p38 inhibitor                         | cAMP downstream pathways   | investigation of GPCR downstream responses | PMID: 31148944                 |
| Darapladib         | PLA2 inhibitor                        | cAMP downstream pathways   | investigation of GPCR downstream responses | PMID: 25838312                 |
| H-89               | PKA inhibitor                         | cAMP downstream pathways   | investigation of GPCR downstream responses | PMID: 31935860                 |
| JSH-23             | NFkB inhibitor                        | cAMP downstream pathways   | investigation of GPCR downstream responses | PMID: 26408955                 |
| SCH772981          | ERK1/2 inhibitor                      | cAMP downstream pathways   | investigation of GPCR downstream responses | PMID: 25451938                 |
| Pioglitazone       | PPAR $\gamma$ agonist                 | metabolic pathways         | inflammatory modulation                    | PMID: 29867927; PMID: 20508200 |
| 9cis-Retinoic acid | RXR-agonist                           | ryanoid receptor signaling | inflammatory modulation                    | PMID: 20498053                 |
| Bexarotene         | RXR-agonist                           | ryanoid receptor signaling | inflammatory modulation                    | PMID: 20498053                 |
| Salbutamol         | $\beta$ 2 adrenergic receptor agonist | adrenergic signaling       | inflammatory modulation                    | PMID: 31680470                 |
| HG-9-91-01         | SIK inhibitor                         | salt inducible kinases     | inflammatory modulation                    | PMID: 27920213                 |
| MCC950             | NLRP3 inhibitor                       | inflammasome               | inflammatory modulation                    | PMID: 25686105                 |

**Fig. S6: Rationale for compound selection**

Compounds were selected by their targets being related to cAMP signaling or associated with direct immune modulatory properties.

# Supplement zu Fig. 5: Cells can be used to identify modulators of phagocytosis

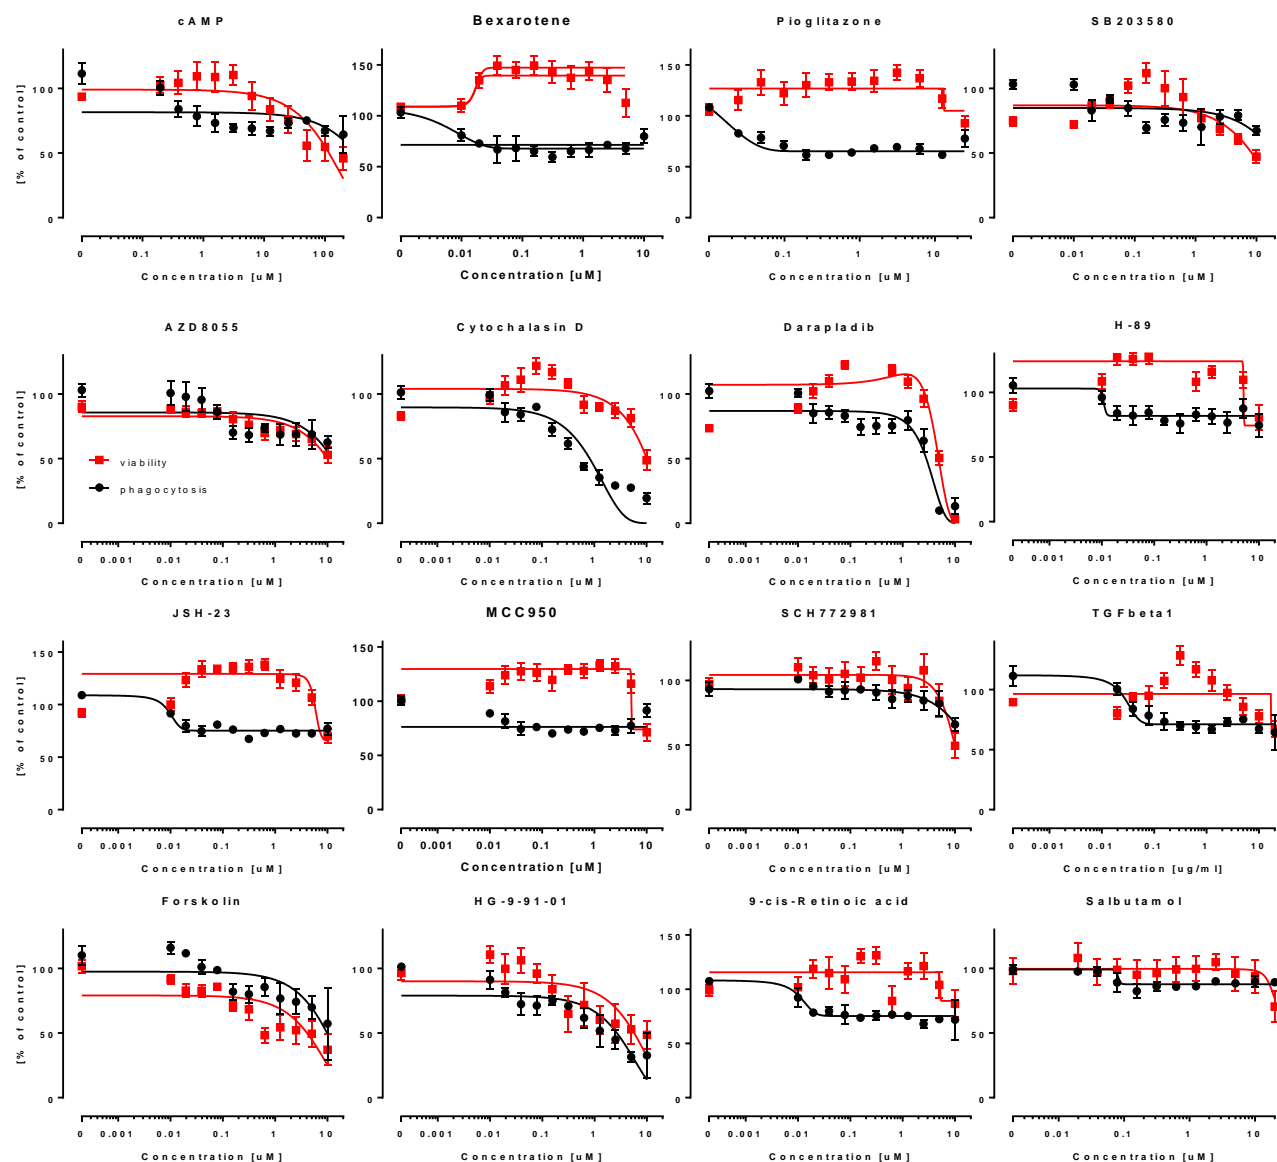

**Fig. S7: Dose response curves for phagocytosis of zymosan**

iPSC derived macrophage progenitors were seeded in 384 well plates at a density of 8000 cells per well and differentiated to M0 Macrophages for 6 days in XVIVO15 media containing M-CSF (100 ng/ml). Cells were pretreated with test compounds for 18 h and than exposed to Zymosan for 2h. Phagocytosis was assessed by high content imaging. Red dose response curves indicate total cell count per well normalized to solvent control. Black dose response curves indicate phagocytosis positive cells relative to solvent control. All values are indicated as mean +/- SEM of 3 independent experiments with 3 replicates per experiment.
